# Supplementary material for: Sitting Time, Physical Activity and Sleep by Work Type and Pattern—The Australian Longitudinal Study on Women’s Health
Source: PubMed Central journal article supplement (PMC5369126; doi:10.3390/ijerph14030290), 2017-03-10

# Supplementary Materials: Sitting Time, Physical Activity and Sleep by Work Type and Pattern—The Australian Longitudinal Study on Women’s Health

Bronwyn K. Clark, Tracy L. Kolbe-Alexander, Mitch J. Duncan and Wendy Brown

## Young Cohort

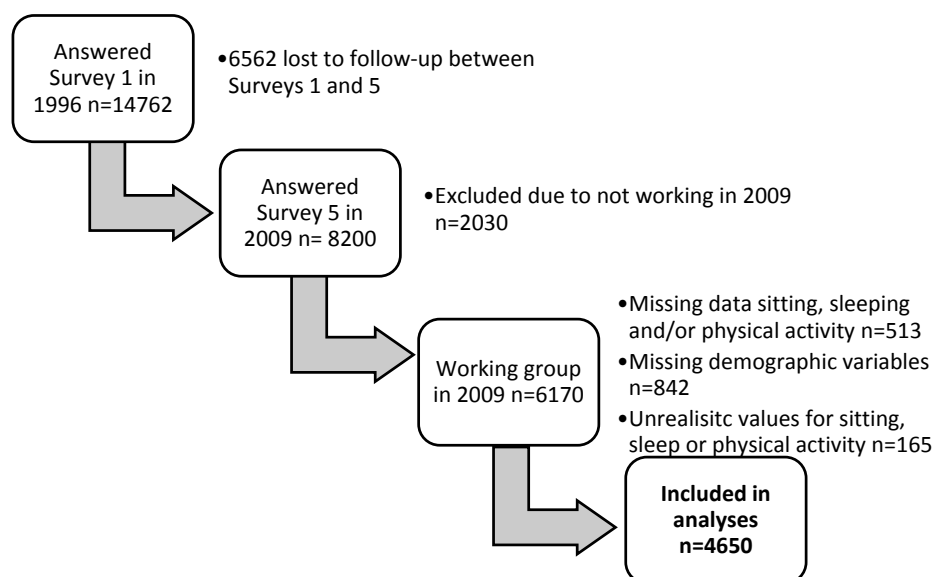

## Mid-aged Cohort

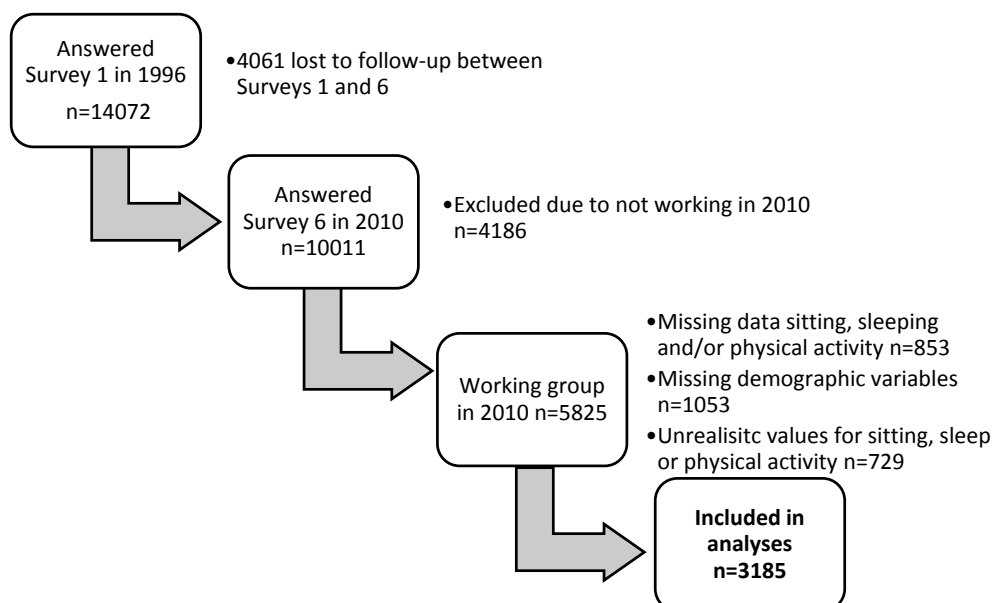

**Figure S1.** Flow Charts for inclusion of participants’ data young and mid-aged women in the Australian Longitudinal Study on Women’s Health.

**Table S1:** Time reported on the individual sitting time questions on work days and non-work days (hours/day) in young ( $n = 4650$ ) and mid-aged ( $n = 3185$ ) women in the Australian Longitudinal Study on Women’s Health (ALSWH).

|                            | Work Days       |                    |                |              |                 | Non-Work Days |                 |                 |                 |                 |
|----------------------------|-----------------|--------------------|----------------|--------------|-----------------|---------------|-----------------|-----------------|-----------------|-----------------|
|                            | Work            | Transport          | TV             | Computer     | Other sedentary | Work          | Transport       | TV              | Computer        | Other sedentary |
| Young cohort               |                 |                    |                |              |                 |               |                 |                 |                 |                 |
| Total Sample               | 5 (1, 7)        | 0.75 (0.33, 1.33)  | 2 (0.75, 2)    | 0.50 (0, 1)  | 0 (0, 1)        | 0 (0, 1)      | 0.50 (0.33, 1)  | 2 (2, 4)        | 1 (0.50, 2)     | 2 (1, 4)        |
| Occupational category      |                 |                    |                |              |                 |               |                 |                 |                 |                 |
| Manager/professional       | 5.50 (2, 7.50)  | 0.83 (0.50, 1.33)  | 2 (1, 2)       | 0.50 (0, 1)  | 0.17 (0, 1)*    | 0 (0, 1)      | 0.50 (0.33, 1)  | 2 (1.5, 3)      | 1 (0.50, 2)     | 2 (1, 4)        |
| Clerical/sales             | 6 (2, 7)*       | 0.67 (0.33, 1)*    | 2 (1, 2)       | 0.50 (0, 1)  | 0 (0, 1)        | 0 (0, 1)      | 0.50 (0.33, 1)  | 3 (2, 4)*       | 1 (0.50, 2)     | 2 (1, 3)*       |
| Trades/production/labourer | 0 (0, 2)*       | 0.67 (0.33, 1.17)* | 1 (0, 2)*      | 0.33 (0, 1)* | 0 (0, 1)*       | 0 (0, 1)*     | 0.50 (0.25, 1)  | 2.50 (1.50, 4)* | 1 (0.50, 2)     | 2 (0, 3)*       |
| Work hours                 |                 |                    |                |              |                 |               |                 |                 |                 |                 |
| Part-time                  | 3 (0.50, 6)     | 0.67 (0.33, 1)     | 1.50 (0.50, 2) | 0 (0, 1)     | 0 (0, 1)        | 0 (0, 1)      | 0.50 (0.33, 1)  | 2 (1.5, 3)      | 1 (0.50, 2)     | 2 (0.50, 3)     |
| Full-time                  | 6 (3, 8)        | 0.83 (0.42, 1.50)* | 2 (1, 2)       | 0.50 (0, 1)  | 0.25 (0, 1)*    | 0 (0, 1)*     | 0.67 (0.33, 1)* | 2.50 (2, 4)*    | 1 (0.50, 2)*    | 2 (1, 4)*       |
| Work pattern regularity    |                 |                    |                |              |                 |               |                 |                 |                 |                 |
| Regular hours              | 5.50 (2, 7.5)   | 0.75 (0.33, 1.33)  | 2 (1, 2)       | 0.50 (0, 1)  | 0 (0, 1)        | 0 (0, 1)      | 0.50 (0.33, 1)  | 2 (2, 4)        | 1 (0.50, 2)     | 2 (1, 4)        |
| Shift or night worker      | 2 (0.50, 6)*    | 0.67 (0.33, 1.29)  | 1 (0, 2)       | 0.50 (0, 1)  | 0 (0, 1)        | 0 (0, 1)      | 0.50 (0.33, 1)  | 2 (2, 4)        | 1 (0.50, 2)     | 2 (0.71, 3)*    |
| Mid-aged Cohort            |                 |                    |                |              |                 |               |                 |                 |                 |                 |
| Total Sample               | 2.5 (0.33, 6)   | 0.5 (0.25, 1)      | 2 (1, 3)       | 0.25 (0, 1)  | 0 (0, 1)        | 0 (0, 1)      | 0.5 (0, 1)      | 3 (2, 4)        | 0.67 (0, 1.5)   | 2 (0, 3)        |
| Occupational category      |                 |                    |                |              |                 |               |                 |                 |                 |                 |
| Manager/professional       | 3.50 (1, 6)     | 0.67 (0.33, 1.21)  | 2 (1, 3)       | 0.50 (0, 1)  | 0 (0, 1)        | 0.25 (0, 1.5) | 0.50 (0.17, 1)  | 3 (2, 4)        | 1 (0.01, 2)     | 2 (0.50, 3)     |
| Clerical/sales             | 4 (0.33, 6.50)* | 0.5 (0.08, 1)      | 2 (1, 3)       | 0 (0, 0.50)* | 0 (0, 1)        | 0 (0, 1)*     | 0.50 (0.08, 1)  | 3 (2, 4)        | 0.50 (0, 1)*    | 2 (0, 3)        |
| Trades/production/labourer | 0 (0, 0.50)*    | 0.50 (0.17, 1)*    | 2 (1, 3)*      | 0 (0, 0.50)* | 0 (0, 0.50)*    | 0 (0, 0.33)*  | 0.50 (0, 1)     | 3 (2, 4)        | 0.50 (0, 1)*    | 1 (0, 2.50)*    |
| Work hours                 |                 |                    |                |              |                 |               |                 |                 |                 |                 |
| Part-time                  | 1 (0, 4.50)     | 0.50 (0.25, 1)     | 2 (1, 3)       | 0.33 (0, 1)  | 0 (0, 1)        | 0 (0, 1)      | 0.50 (0, 1)     | 3 (2, 4)        | 1 (0, 1.50)     | 2 (0, 3)        |
| Full-time                  | 5 (1, 7)*       | 0.67 (0.33, 1.17)* | 2 (1, 3)*      | 0.25 (0, 1)* | 0 (0, 1)        | 0 (0, 1)      | 0.50 (0.17, 1)  | 3 (2, 4)        | 0.50 (0, 1.50)  | 2 (0, 3)        |
| Work pattern regularity    |                 |                    |                |              |                 |               |                 |                 |                 |                 |
| Regular hours              | 3 (0.33, 6)     | 0.50 (0.25, 1)     | 2 (1, 3)       | 0.33 (0, 1)  | 0 (0, 1)        | 0.50 (0, 1)   | 0.50 (0, 1)     | 3 (2, 4)        | 0.75 (0, 1.50)  | 2 (0, 3)        |
| Shift or night worker      | 1 (0.17, 3)*    | 0.50 (0.33, 1)     | 1.50 (0, 2)*   | 0 (0, 1)*    | 0 (0, 1)        | 0 (0, 1)      | 0.54 (0.17, 1)  | 3 (2, 4)        | 0.50 (0, 1.50)* | 2 (0, 3)        |

Data for sedentary times are median (25, 75%); \*: median different to top category  $p < 0.01$ ; Young cohort: in 2009 aged 31-36 years; Mid-aged cohort: in 2010 aged 59-64 years.

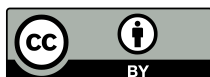

Supplement: ijerph-14-00290-s001.pdf [file ijerph-14-00290-s001.pdf]
